# Supplementary material
Source: HighWire-hosted journal article supplement (https://cmajopen-stage.highwire.org/highwire/filestream/85279/field_highwire_adjunct_files/6/2019-0225-reprise-checklist.pdf)
Supplement: 2019-0225-reprise-checklist.pdf [file 2019-0225-reprise-checklist.pdf]

## REPRISE Reporting Checklist:

| No | Item                                                                        | Descriptor and/or examples                                                                                                                                                                            | Page No |
|----|-----------------------------------------------------------------------------|-------------------------------------------------------------------------------------------------------------------------------------------------------------------------------------------------------|---------|
| A  | Context and scope                                                           |                                                                                                                                                                                                       | 3-4     |
| 1  | Define geographical scope                                                   | Global, regional, national, city, local area, institutional/organizational level, health service                                                                                                      | 3       |
| 2  | Define health area, field, focus                                            | Disease or condition specific, interventions, healthcare delivery, health system                                                                                                                      | 3-4     |
| 3  | Define the intended beneficiaries                                           | This may include the general population or a specific population based on demographic (age, gender), clinical (disease, condition), or other characteristics who may benefit from the research        | 4,10,12 |
| 4  | Define the target audience of the priorities                                | Policy makers, funders, researchers, industry or others who have the potential to implement the priorities identified                                                                                 | 10,12   |
| 5  | Identify the research area                                                  | Public health, health services research, clinical research, basic science                                                                                                                             | 4,5     |
| 6  | Identify the type of research questions                                     | Etiology, diagnosis, prevention, treatment (interventions), prognosis, health services, psychosocial, behavioral and social science, economic evaluation, implementation; this may not be pre-defined | 4       |
| 7  | Define the time frame                                                       | Interim, short-term, long-term priorities, plans to revise and update                                                                                                                                 | N/A     |
| B  | Governance and team                                                         |                                                                                                                                                                                                       | 4,5     |
| 8  | Describe the selection and structure of the leadership and management team  | Those responsible for initiating, developing, and guiding the process for priority setting, and examples of structures include; Steering Committee, Advisory Group, Technical Experts                 | 4,5     |
| 9  | Describe the characteristics of the team                                    | Stakeholder group or role, institutional affiliations, country or region, demographics (e.g. age sex), discipline, experience, expertise                                                              | 5,6     |
| 10 | Describe any training or experience relevant to conducting priority setting | Consultants or advisors, members with experience or skills relevant to the conducting priority-setting e.g. qualitative methods, surveys, facilitation                                                | 4,5,6   |
| C  | Framework for priority setting                                              | James Lind Alliance, COHRED, CHNRI, Dialogue Model, no framework (general research priority setting)                                                                                                  | 3,5     |
| 11 | State the framework used (if any)                                           |                                                                                                                                                                                                       | 3       |
| D  | Stakeholders or participants                                                |                                                                                                                                                                                                       | 4,5     |

| No | Item                                                                                      | Descriptor and/or examples                                                                                                                                                                                                                                                                                 | Page No             |
|----|-------------------------------------------------------------------------------------------|------------------------------------------------------------------------------------------------------------------------------------------------------------------------------------------------------------------------------------------------------------------------------------------------------------|---------------------|
| 12 | Define the inclusion criteria for stakeholders involved in priority-setting               | Patients, caregivers, general community, health professionals, researchers, policy makers, non-governmental organizations, government, industry; specific groups including vulnerable and marginalized populations                                                                                         | 5                   |
| 13 | State the strategy or method for identifying and engaging stakeholders                    | Partnership with organizations, social media, recruitment through hospitals                                                                                                                                                                                                                                | 4-7                 |
| 14 | Indicate the number of participants and/or organizations involved                         | Number of individuals and organizations, include number by stakeholder group                                                                                                                                                                                                                               | 5,7                 |
| 15 | Describe the characteristics of stakeholders                                              | Stakeholder group, demographic characteristics, areas of interest and expertise, discipline, affiliations                                                                                                                                                                                                  | 5-7 and suppl table |
| 16 | State if reimbursement for participation was provided                                     | Cash, vouchers, certificates, acknowledgement; what purpose e.g. travel, accommodation, honorarium                                                                                                                                                                                                         | 8                   |
| E  | Identification and collection of research priorities                                      |                                                                                                                                                                                                                                                                                                            | 7                   |
| 17 | Describe methods for collecting initial priorities                                        | Methods e.g. Delphi survey, surveys, nominal group technique, interviews, focus groups, meetings, workshops; prioritization e.g. voting, ranking; mode e.g. face-to-face, online; may be informed by evidence e.g. systematic reviews, reviews of guidelines/other documents, health technology assessment | 6,7                 |
| 18 | Describe methods for collating and categorizing priorities                                | Taxonomy or other framework used to organize, summarise, and aggregate topics or questions                                                                                                                                                                                                                 | 6,7                 |
| 19 | Describe methods and reasons for modifying (removing, adding, reframing) priorities       | Based on scope, clarity, definition, duplication, other criteria                                                                                                                                                                                                                                           | 7,8                 |
| 20 | Describe methods for refining or translating priorities into research topics or questions | Reviewed by Steering Committee or project team                                                                                                                                                                                                                                                             | 6-8                 |
| 21 | Describe methods for checking whether research questions or topics have been answered     | Systematic reviews, evidence mapping, consultation with experts                                                                                                                                                                                                                                            | 8                   |
| 22 | Describe number of research questions or topics                                           | Number of priorities at each stage of the process                                                                                                                                                                                                                                                          | Table 4, p17        |
| F  | Prioritization of research topics/questions                                               |                                                                                                                                                                                                                                                                                                            | 8                   |

| No | Item                                                                                                                                    | Descriptor and/or examples                                                                                                                                                                                                         | Page No                        |
|----|-----------------------------------------------------------------------------------------------------------------------------------------|------------------------------------------------------------------------------------------------------------------------------------------------------------------------------------------------------------------------------------|--------------------------------|
| 23 | Describe methods and criteria for prioritizing research topics or questions                                                             | Methods e.g. Delphi survey, surveys, nominal group technique, interviews, focus groups, meetings, workshops; Prioritization e.g. voting, ranking; Mode e.g. face-to-face, online; Criteria e.g. need, feasibility, novelty, equity | 6,9                            |
| 24 | State the method or threshold for excluding research topics/questions                                                                   | Thresholds for ranking scores, proportions, votes; other criteria                                                                                                                                                                  | 8                              |
| G  | Output                                                                                                                                  |                                                                                                                                                                                                                                    |                                |
| 25 | State the approach to formulating the research priorities                                                                               |                                                                                                                                                                                                                                    |                                |
| H  | Evaluation and feedback                                                                                                                 | Area, topic, questions, PICO (population, intervention, comparator, outcome)                                                                                                                                                       | 7                              |
| 26 | Describe how the process of prioritization was evaluated                                                                                |                                                                                                                                                                                                                                    |                                |
| 27 | Describe how priorities were fed back to stakeholders and/or to the public; and how feedback (if received) was addressed and integrated |                                                                                                                                                                                                                                    |                                |
| I  | Implementation                                                                                                                          | Survey, workshop                                                                                                                                                                                                                   | 12                             |
| 28 | Outline the strategy or action plans for implementing priorities                                                                        |                                                                                                                                                                                                                                    |                                |
| 29 | Describe plans, strategies, or suggestions to evaluate impact                                                                           |                                                                                                                                                                                                                                    |                                |
| J  | Funding and conflict of interest                                                                                                        | Communication with target audience, via policies and funding                                                                                                                                                                       | 12                             |
| 30 | State sources of funding                                                                                                                |                                                                                                                                                                                                                                    |                                |
| 31 | Declare any conflicts or competing interests                                                                                            |                                                                                                                                                                                                                                    |                                |
|    |                                                                                                                                         | Integration in decision-making, funding allocation, review of relevant documents                                                                                                                                                   | NA                             |
|    |                                                                                                                                         | Name sources of funding for the priority-setting exercise; if relevant include the budget and/or cost                                                                                                                              | 8                              |
|    |                                                                                                                                         | State any conflicts of interest that may be at an individual level and/or at a contextual level (e.g. political issues, controversies) that may affect the process, output or implementation.                                      | Included as per journal policy |
